# Supplementary material for: Natal Origin and Spatiotemporal Distribution of Leatherback Turtle (Dermochelys coriacea) Strandings at a Foraging Hotspot in Temperate Waters of the Southwest Atlantic Ocean
Source: MDPI journal article supplement (doi:10.3390/ani13081285), 2023-04-08
Supplement: s1 [file s1]

## Supplementary Materials

**Table S1:** Estimated mixed stock analysis (MSA) contributions from Atlantic leatherback rookeries to the SWAO foraging aggregation using flat priors (MSA<sub>1</sub>) and weighted rookery size priors (MSA<sub>2</sub>). The mean and upper and lower 95% credible intervals (CI) are shown. Abbreviations correspond with Figure 1

| Stock | MSA              | Mean          | Standard deviation | 2.5%   | Median | 97.5%  |
|-------|------------------|---------------|--------------------|--------|--------|--------|
| BRA   | MSA <sub>1</sub> | 0.0100        | 0.0202             | 0.0000 | 0.0007 | 0.0724 |
|       | MSA <sub>2</sub> | 0.0103        | 0.0200             | 0.0000 | 0.0007 | 0.0698 |
| NWC   | MSA <sub>1</sub> | 0.0146        | 0.0303             | 0.0000 | 0.0007 | 0.1081 |
|       | MSA <sub>2</sub> | 0.0132        | 0.0312             | 0.0000 | 0.0005 | 0.1113 |
| SEC   | MSA <sub>1</sub> | 0.0047        | 0.0113             | 0.0000 | 0.0002 | 0.0404 |
|       | MSA <sub>2</sub> | 0.0046        | 0.0120             | 0.0000 | 0.0002 | 0.0403 |
| STX   | MSA <sub>1</sub> | 0.0037        | 0.0097             | 0.0000 | 0.0001 | 0.0337 |
|       | MSA <sub>2</sub> | 0.0047        | 0.0120             | 0.0000 | 0.0002 | 0.0408 |
| GHA   | MSA <sub>1</sub> | <b>0.3753</b> | 0.2066             | 0.0001 | 0.3513 | 0.9369 |
|       | MSA <sub>2</sub> | <b>0.3504</b> | 0.1588             | 0.0331 | 0.3354 | 0.7419 |
| GAB   | MSA <sub>1</sub> | <b>0.5642</b> | 0.2064             | 0.0002 | 0.5872 | 0.9275 |
|       | MSA <sub>2</sub> | <b>0.5916</b> | 0.1636             | 0.1887 | 0.6046 | 0.8796 |
| SAF   | MSA <sub>1</sub> | 0.0277        | 0.0429             | 0.0000 | 0.0050 | 0.1486 |

|                  |        |        |        |        |        |
|------------------|--------|--------|--------|--------|--------|
| MSA <sub>2</sub> | 0.0252 | 0.0402 | 0.0000 | 0.0035 | 0.1414 |
|------------------|--------|--------|--------|--------|--------|

---
